# Supplementary material for: Assembling polymeric silver nanowires for transparent conductive cellulose nanopaper
Source: Royal Society of Chemistry journal article supplement (doi:10.1039/c9tc03913a), 2019-01-01
Supplement: c9tc03913a1.pdf [file c9tc03913a1.pdf]

## Electronic Supplementary Information

### Assembling polymeric silver nanowires for transparent conductive cellulose nanopaper

Yongxiang Su,<sup>a,b</sup> Shuai Yuan,<sup>b</sup> Shaomei Cao,<sup>b</sup> Miao Miao,<sup>b</sup> Liyi Shi,<sup>b</sup> Xin Feng<sup>a,b,\*</sup>

<sup>a</sup>School of Materials Sciences and Engineering, Shanghai University, Shanghai 200444, P. R. China.

<sup>b</sup>Research Center of Nano Science and Technology, Shanghai University, Shanghai 200444, P. R. China.

Email: [fengxin@shu.edu.cn](mailto:fengxin@shu.edu.cn); Tel.: +86 21 66137153; Fax: +86 21 66136038.

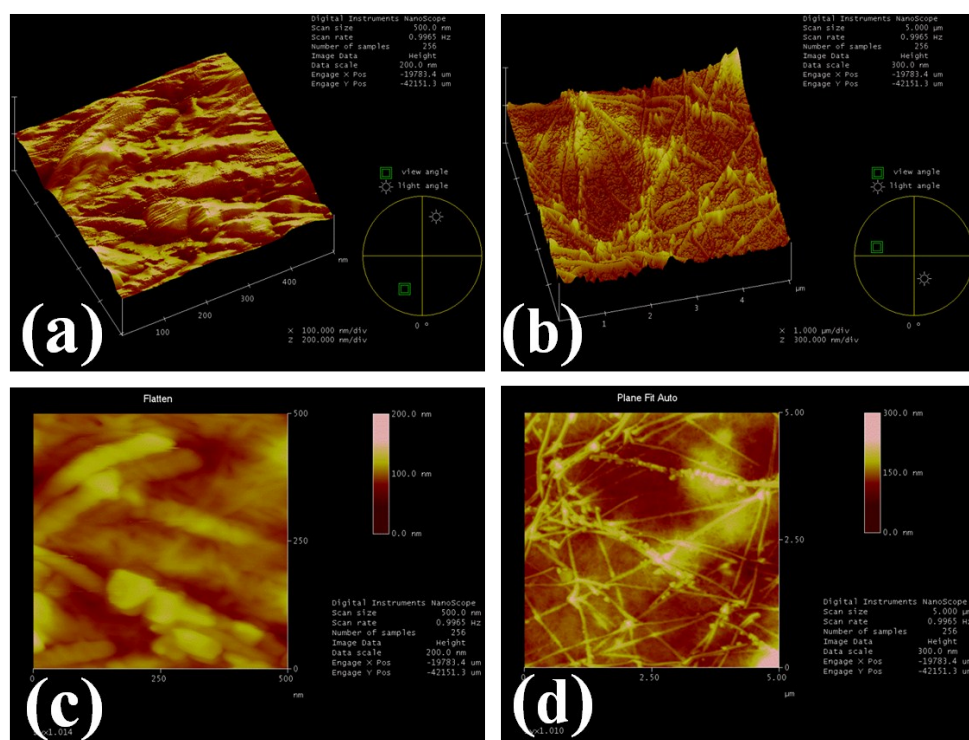

Fig. S1 AFM images of the PDA@NFC-AgNW/PEDOT:PSS TCCNP.

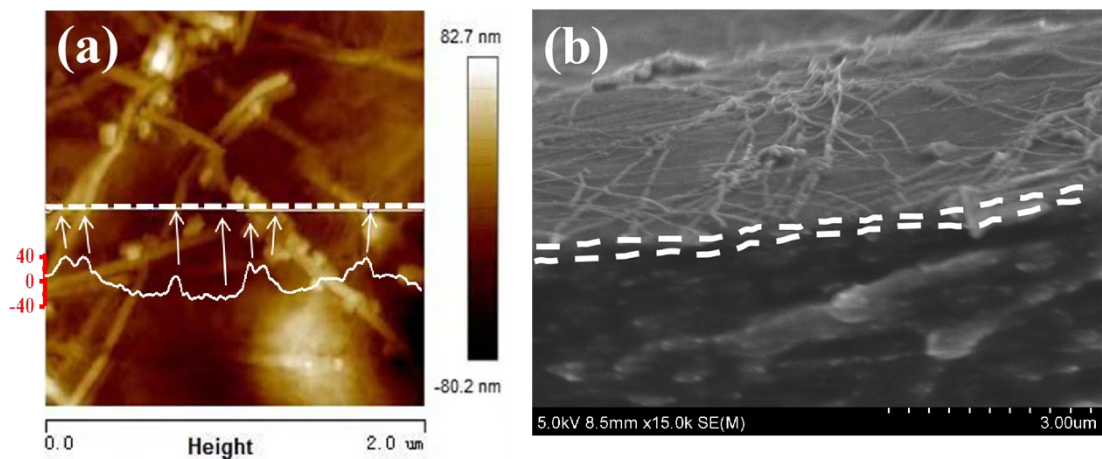

**Fig. S2** (a) AFM profile and (b) cross-sectional SEM image of PDA@NFC-AgNW /PEDOT:PSS TCCNP.

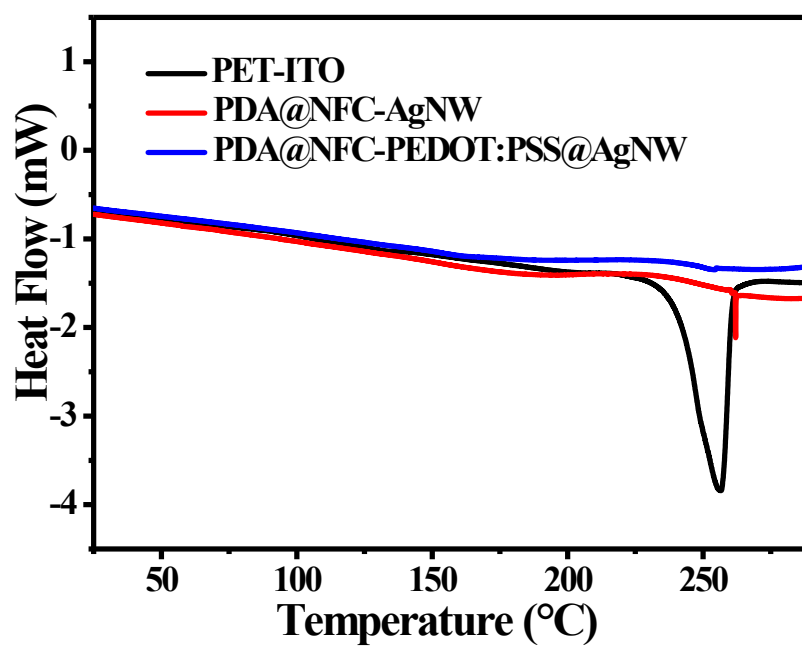

**Fig. S3** DSC curves of the PET-ITO TCF, PDA@NFC-AgNW TCCNP and PDA@NFC-AgNW/PEDOT:PSS TCCNP.

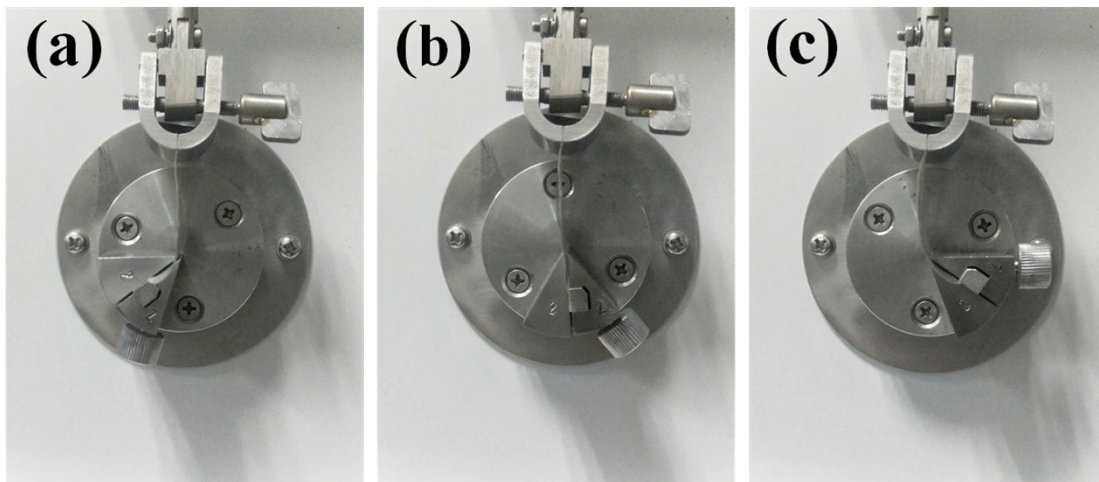

Fig. S4 The bending test by a folding tester.

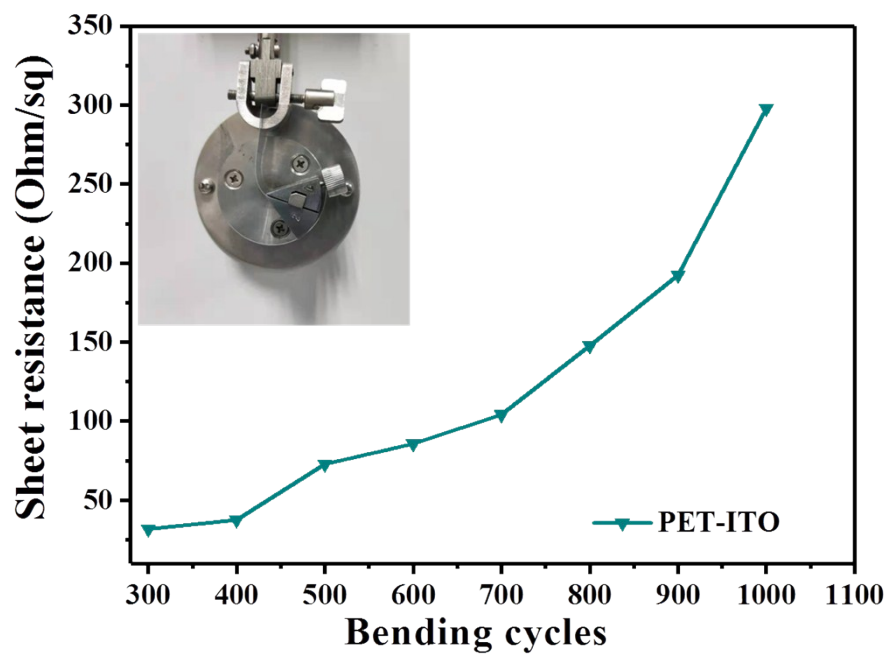

Fig. S5 The variations of sheet resistance for PET-ITO TCF from 300 to 1000 bending cycles.
